# Supplementary material
Source: PubMed Central journal article supplement (PMC3663434)
Supplement: supp_blood-2012-09-454710_blood-2012-09-454710-1.pdf [file supp_blood-2012-09-454710_blood-2012-09-454710-1.pdf]

**Day 1**

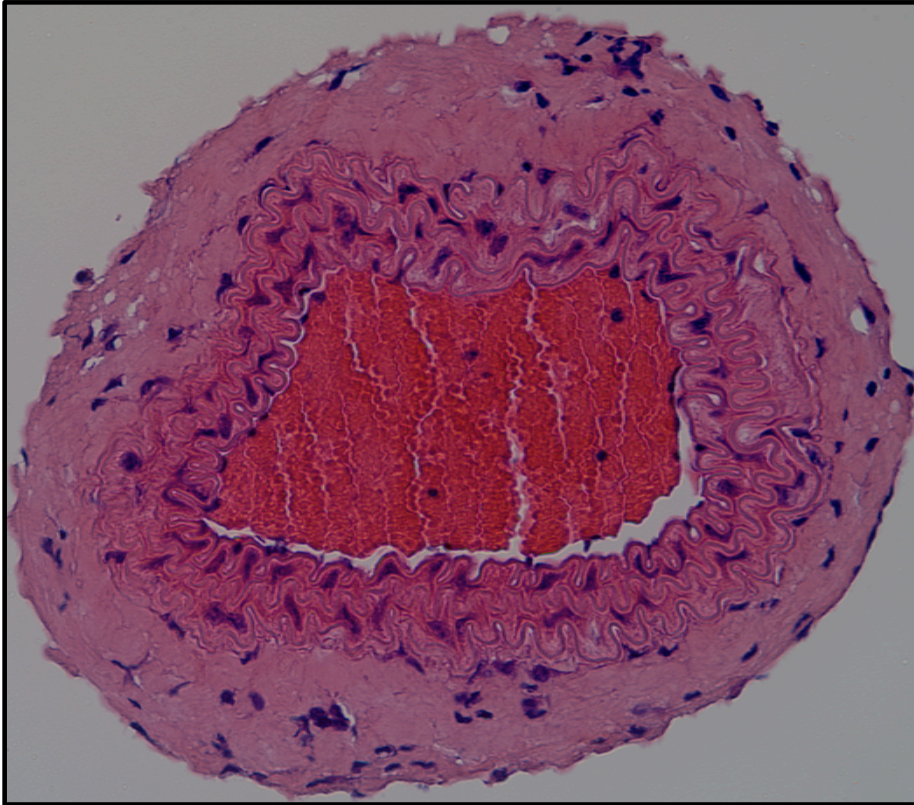

**Day 9**

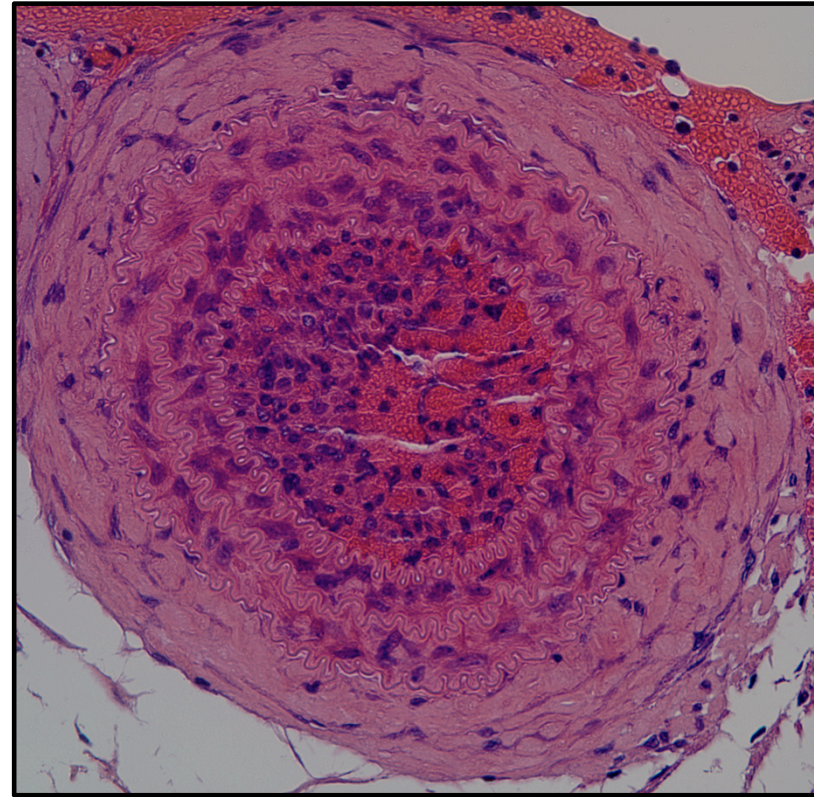

**S1. Vascular changes post-ligation.**

**Day 1**

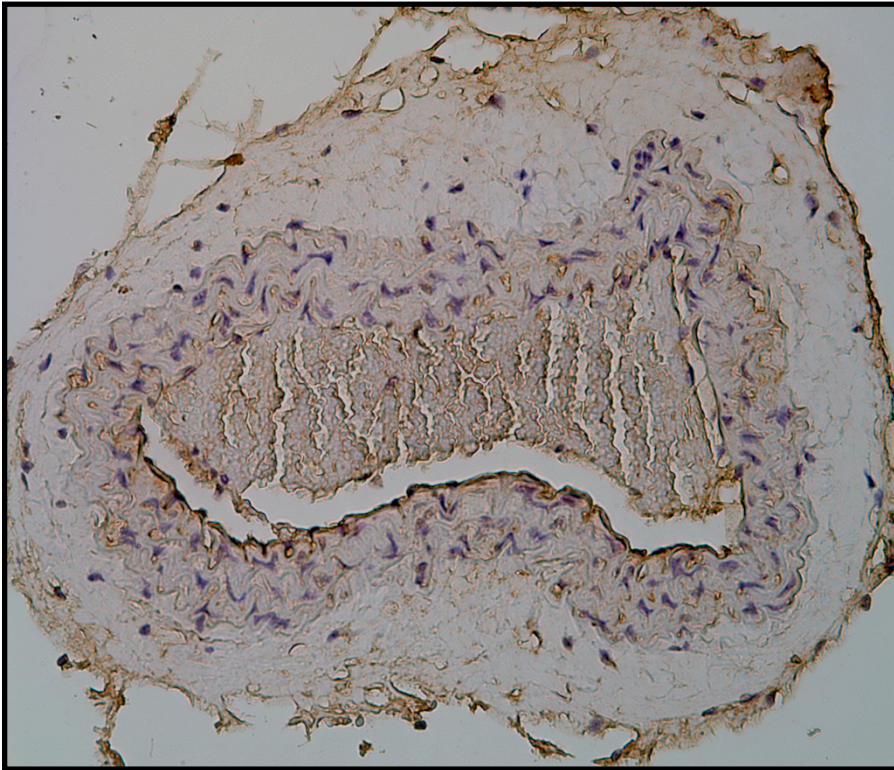

**Day 9**

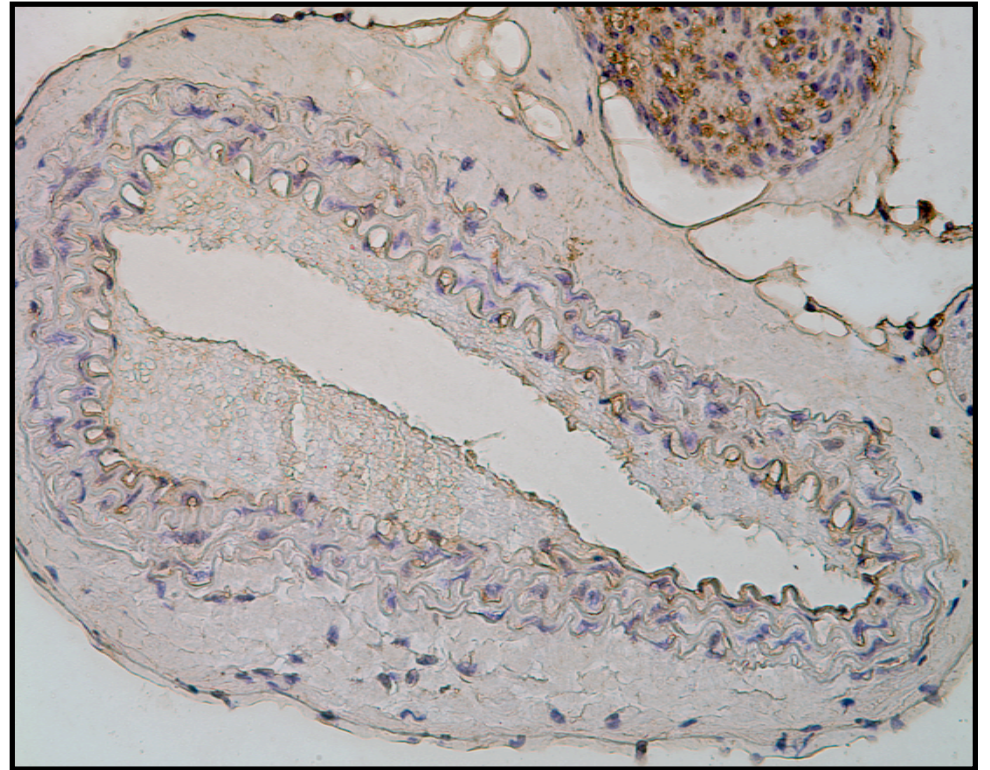

**S2. Control non-ligated right carotid PF4 immunohistochemical staining.**

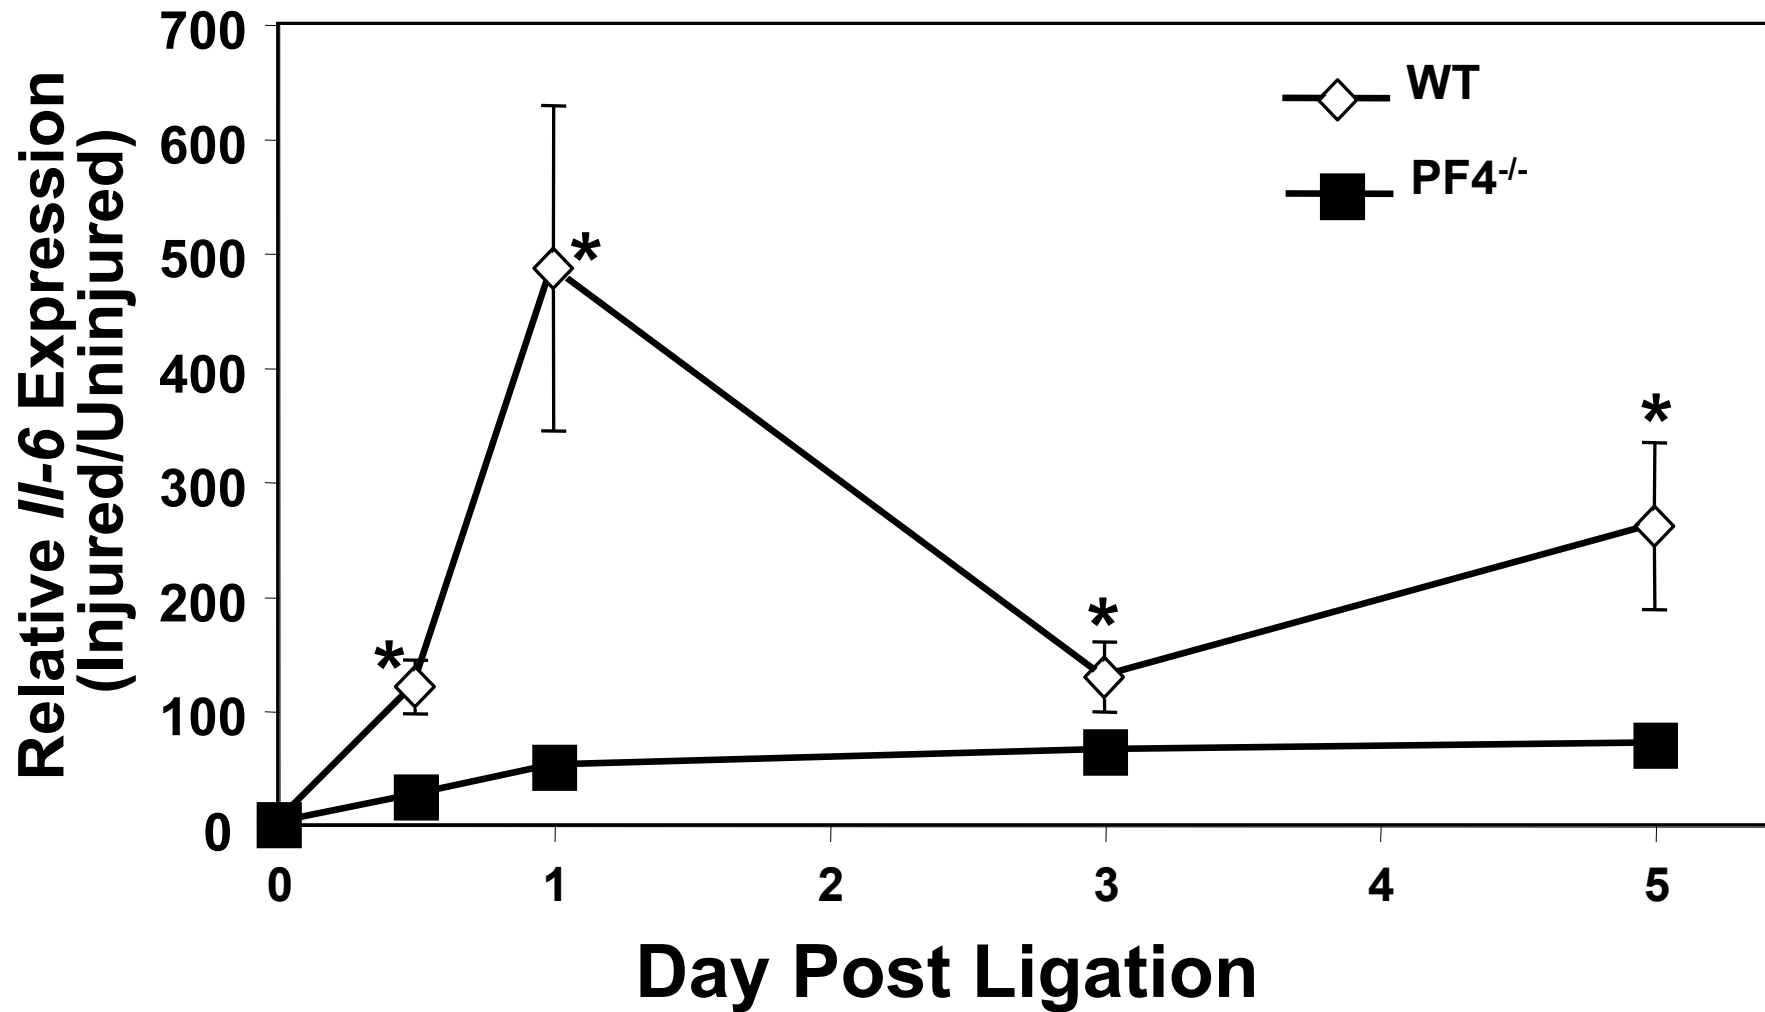

**S3. Ligated carotids have increased *IL-6* mRNA expression as measured by qRT-PCR.**

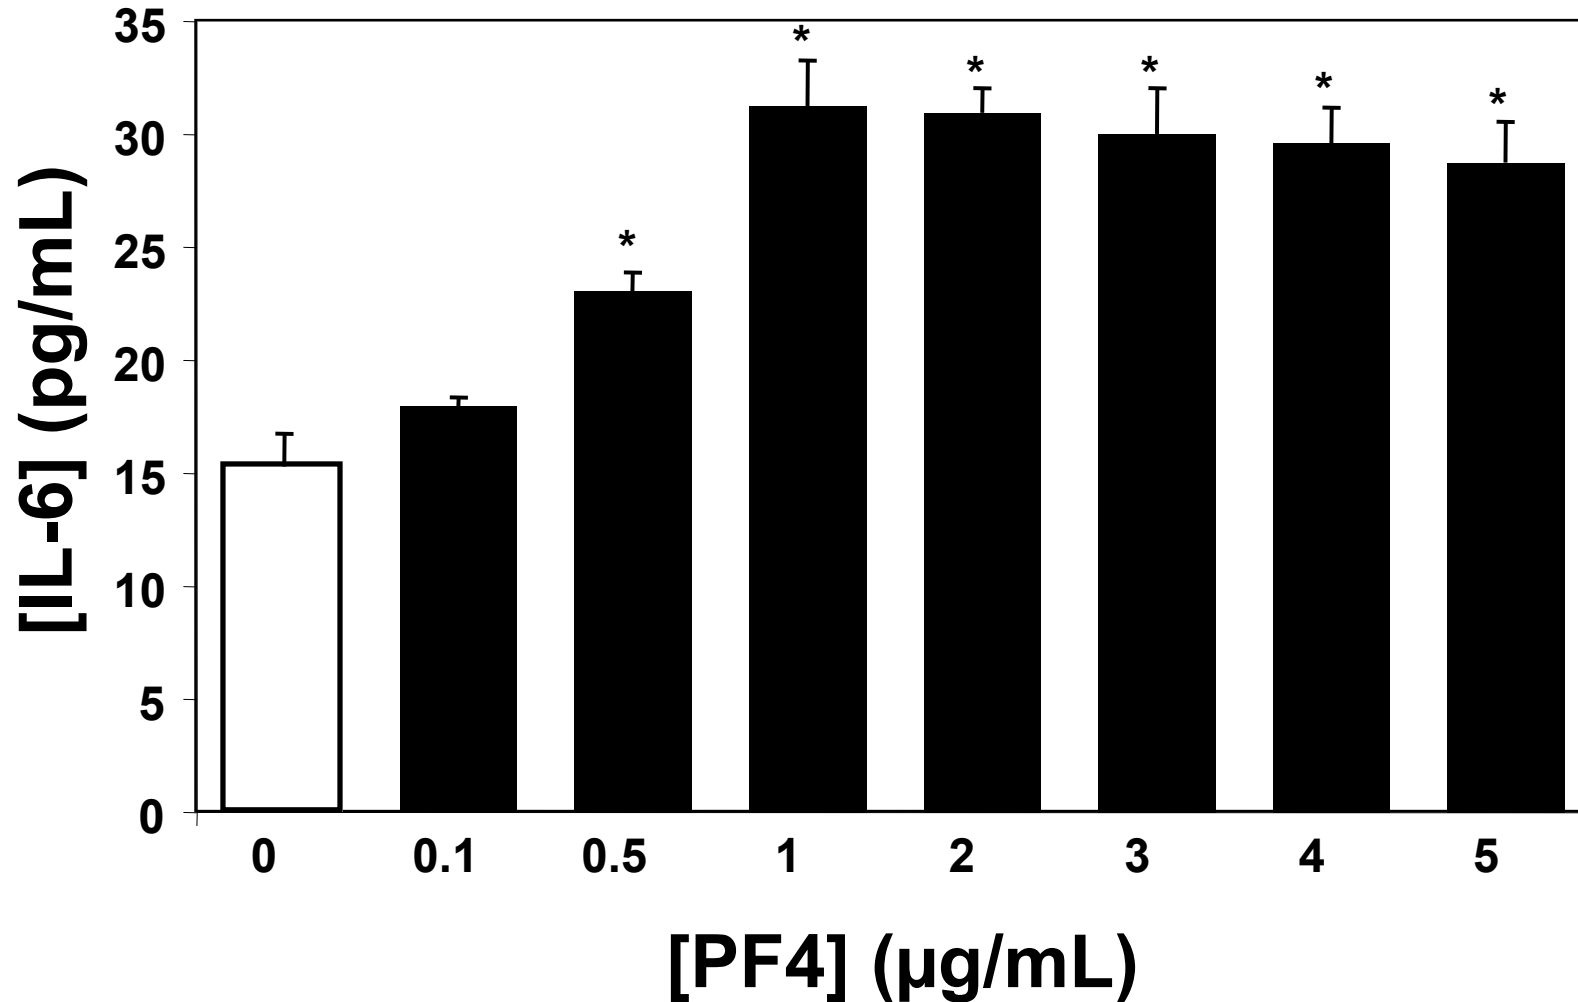

**S4. High concentrations of PF4 have similar IL-6 response as those more typical of plasma concentrations (n=4±S.D.;\*P<0.01 vs Control).**

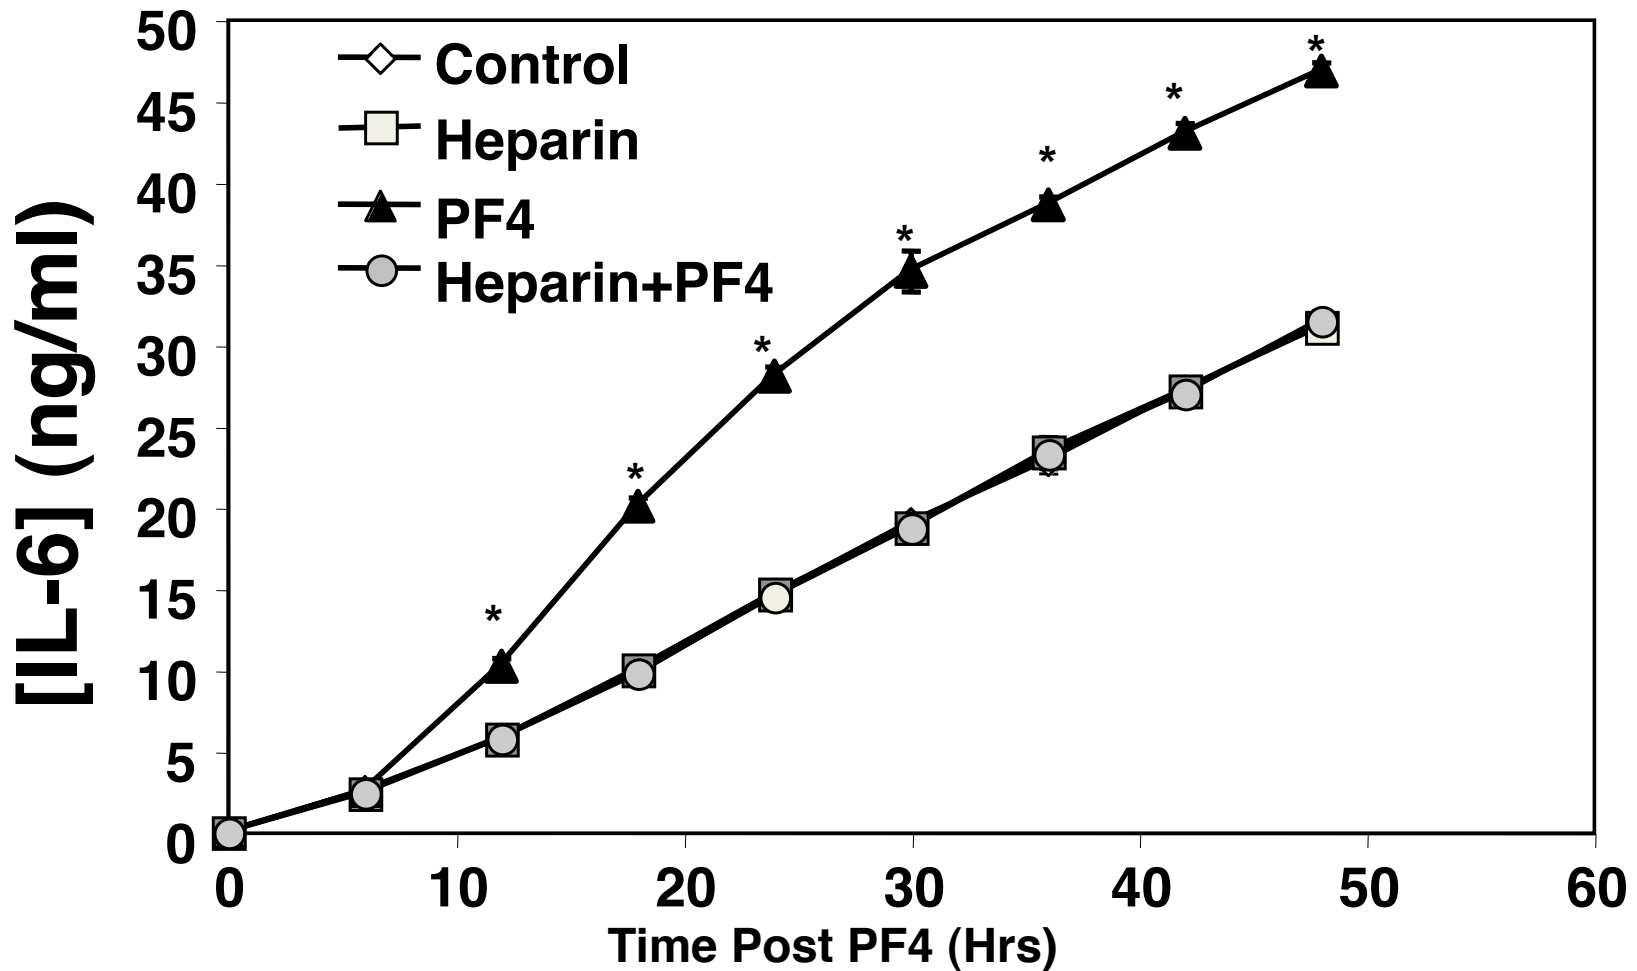

**S5. PF4 response time course. VSMC were treated with 1  $\mu$ g/mL of PF4 and IL-6 measured at multiple time points ( $n=4 \pm$  S.D.; \* $P < 0.01$  vs Control).**

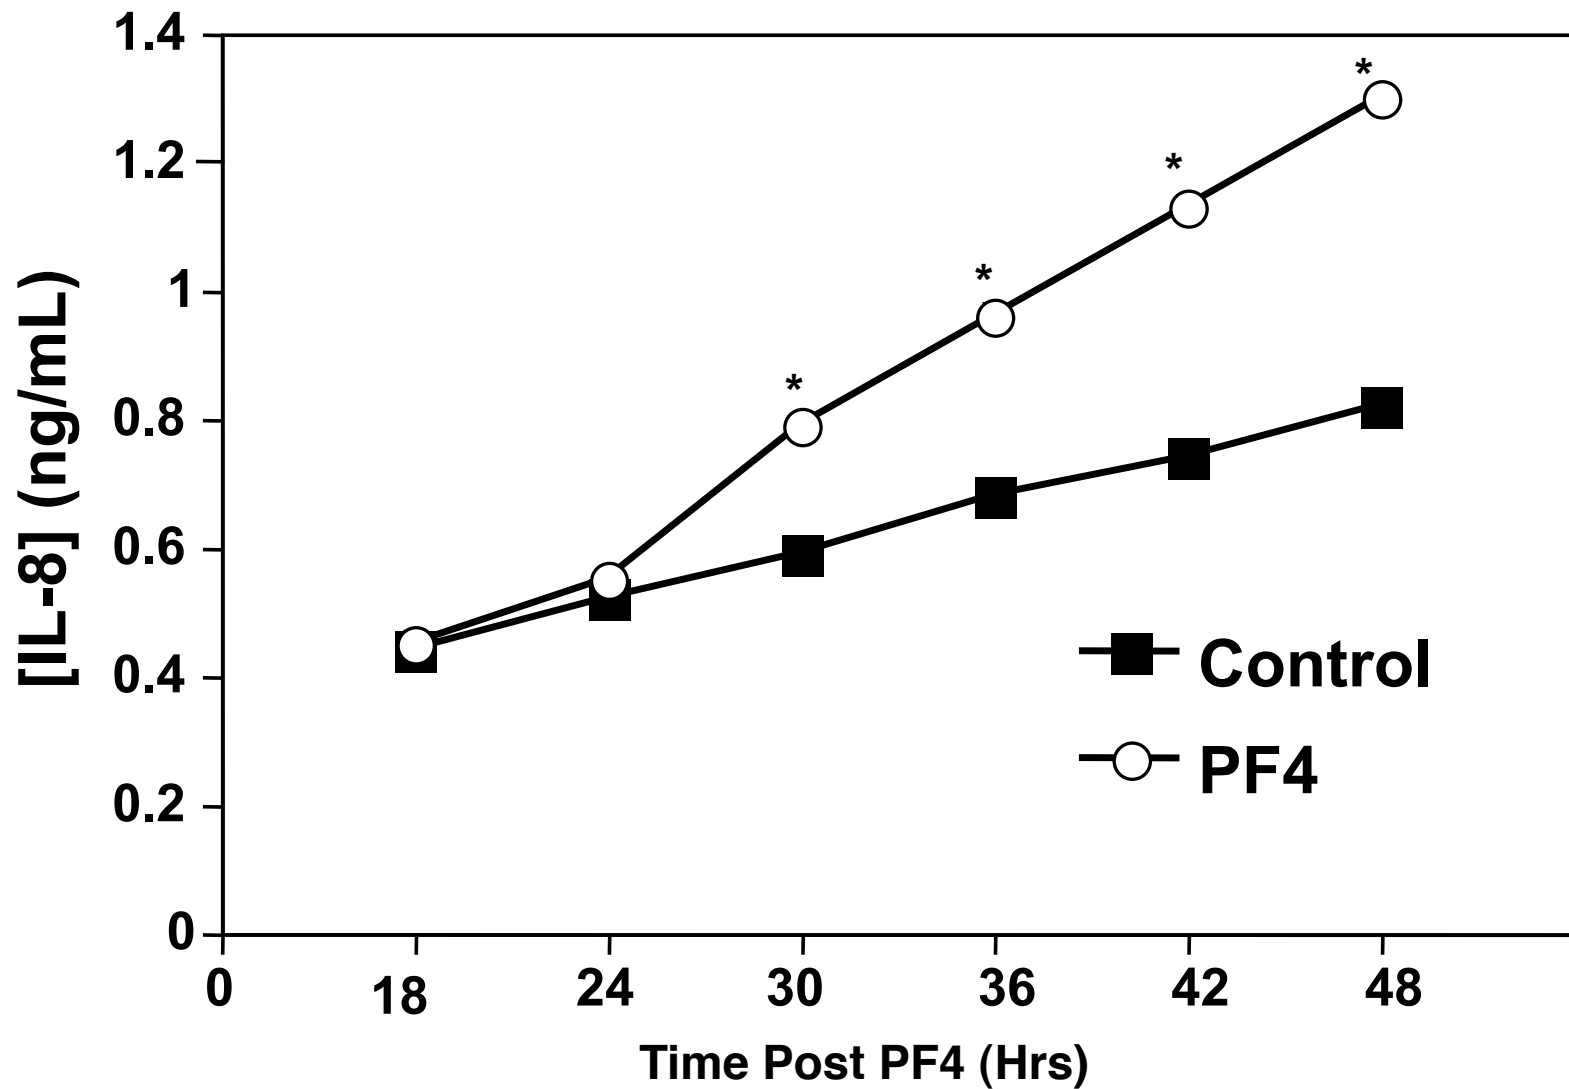

**S6. PF4 induces IL-8 production from HCASM cells.  
(n=4±S.D.;\*P<0.01 vs Control).**

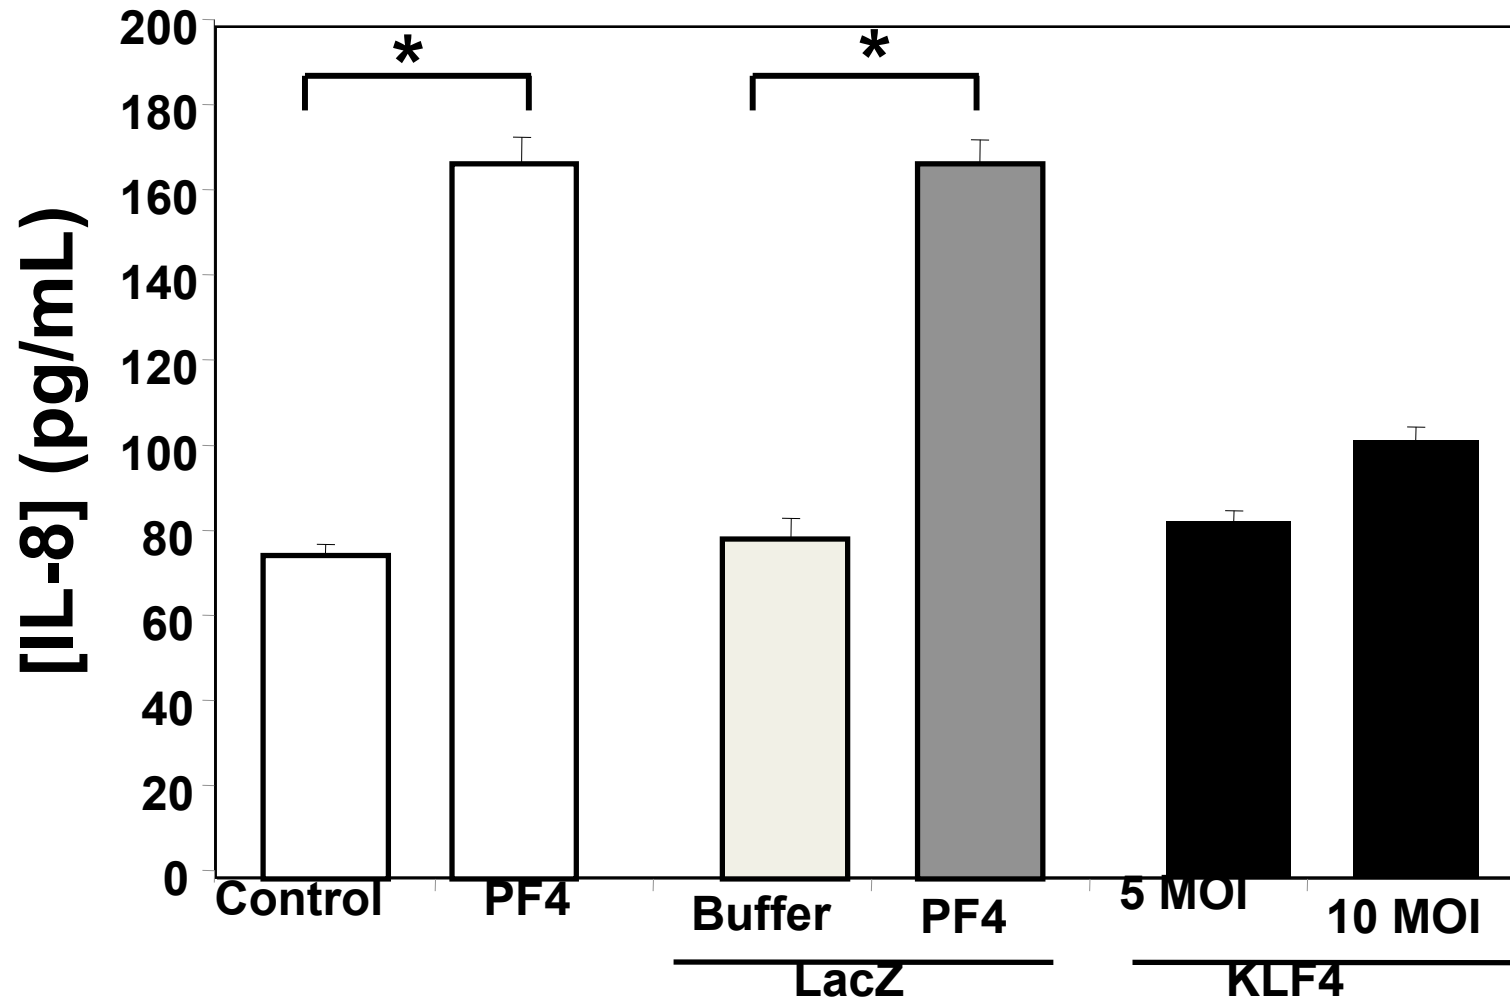

**S7. HCASM cells were infected with a KLF4 adenovirus (5 and 10 MOI), a control LacZ adenovirus (10 MOI) or were null infected. Controls were also treated with buffer or PF4 (1  $\mu\text{g}/\text{mL}$ ). Over-expression of KLF4 did not increase IL-8 ( $n=3 \pm \text{S.D.}$ ).**

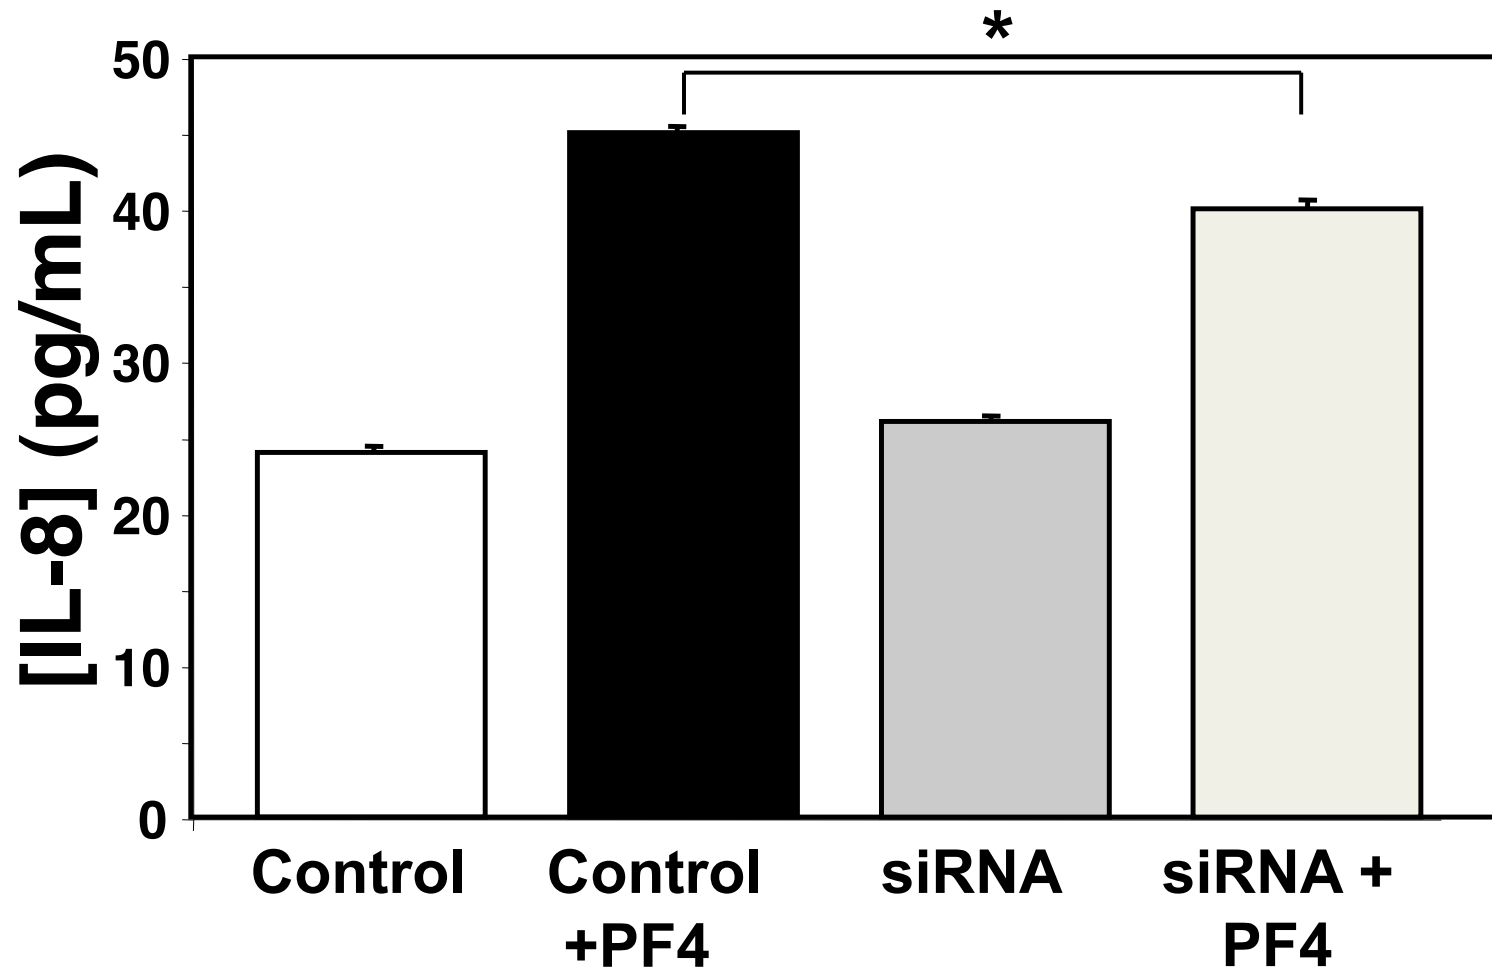

**S8. Inhibition of KLF4 expression has minimal effects on IL-8. HCASM cells were treated with scramble control siRNA or KLF4 specific siRNA prior to PF4. IL-8 was measured by ELISA (n=3 ± S.D.).**
